# Supplementary material for: Heterogeneous microstructures of spherulites of lipid mixtures characterized with synchrotron radiation microbeam X-ray diffraction
Source: Royal Society of Chemistry journal article supplement (doi:10.1039/c1ce05667k), 2011-01-01

**Supplementary Text:** Details of the experimental set-up for carrying out the SR- $\mu$ -XRD experiments at the beamline BL-4A of the synchrotron radiation facility Photon Factory (PF) at the High-Energy Accelerator Research Organization (KEK) in Tsukuba (Japan). Information obtained from S. Ueno, T. Nishida and K. Sato, *Cryst. Growth Des.*, 2008, **8** (3), 751.

The sample set was placed in a temperature-controlled furnace, Linkam LK-600. Using an Olympus CX31 microscope system, polarized optical-microscope observations and SR- $\mu$ B-XRD measurements were carried out. The SR- $\mu$ B-XRD measurement was performed at beamline 4A of the Photon Factory, the synchrotron radiation facility of the High-Energy Accelerator Research Organization (KEK), Tsukuba, Japan. A microbeam was prepared by reflecting a synchrotron X-ray beam onto a K-B mirror and focusing the reflected beam on the sample position. The wavelength of the X-ray microbeam was 0.11 nm, and the focused beam size was  $5 \times 5 \mu\text{m}$ . The position of the microbeam was detected by moving a wire ( $40 \mu\text{m}$  diameter) perpendicular to beam direction, and always pointed on a monitor image on which the sample subjected to microbeam diffraction was shown using an optical microscope (magnification 100 to 200 $\times$ ). The sample was moved by an x-y-z stepping motor ( $1 \mu\text{m}$  step) while being observed by the optical microscope. The length between the sample and the detector was around 110 cm. Because of the difficulty in simultaneous measurements of the small-angle and wide-angle X-ray scattering, we only observed the small-angle X-ray scattering (SAXS) in the SR- $\mu$ B-XRD experiments.

**Fig. S1** Scanning SR- $\mu$ -XRD patterns taken at the all positions of a spherulite of the mixture of 25POP:75OPO grown from neat liquid (a) at 9 °C and (b) at 6 °C

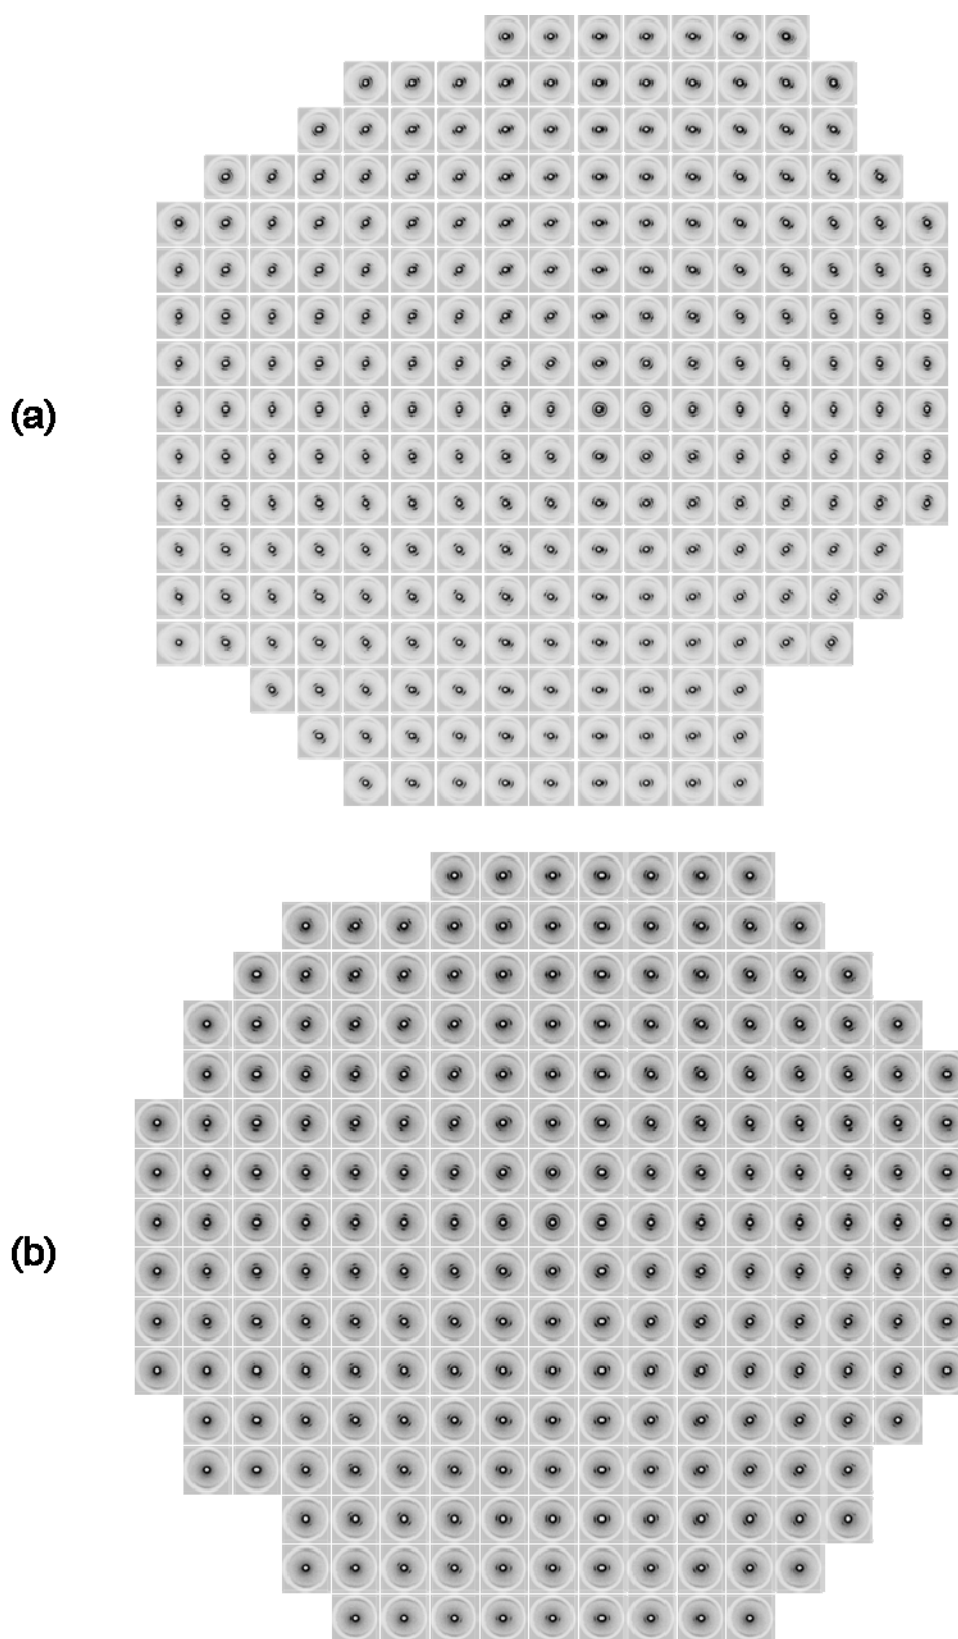

**Fig. S2** Scanning SR- $\mu$ -XRD patterns of a spherulite of the mixture of 75POP:25OPO grown from n-dodecane solution at 7 °C

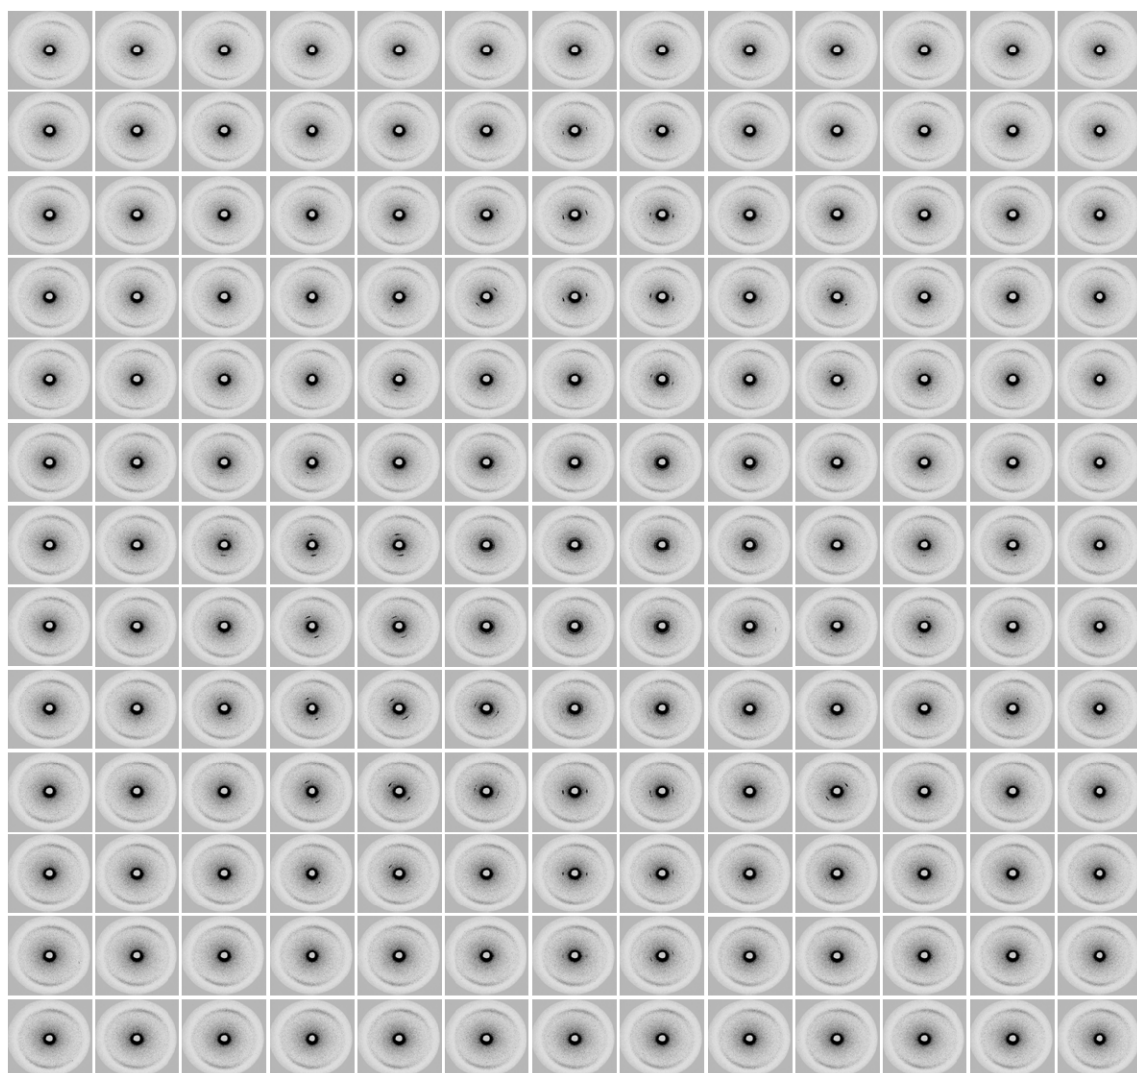

**Fig. S3** Scanning SR- $\mu$ -XRD patterns of a spherulite of 25POP:75OPO grown from n-dodecane solution at 2 °C

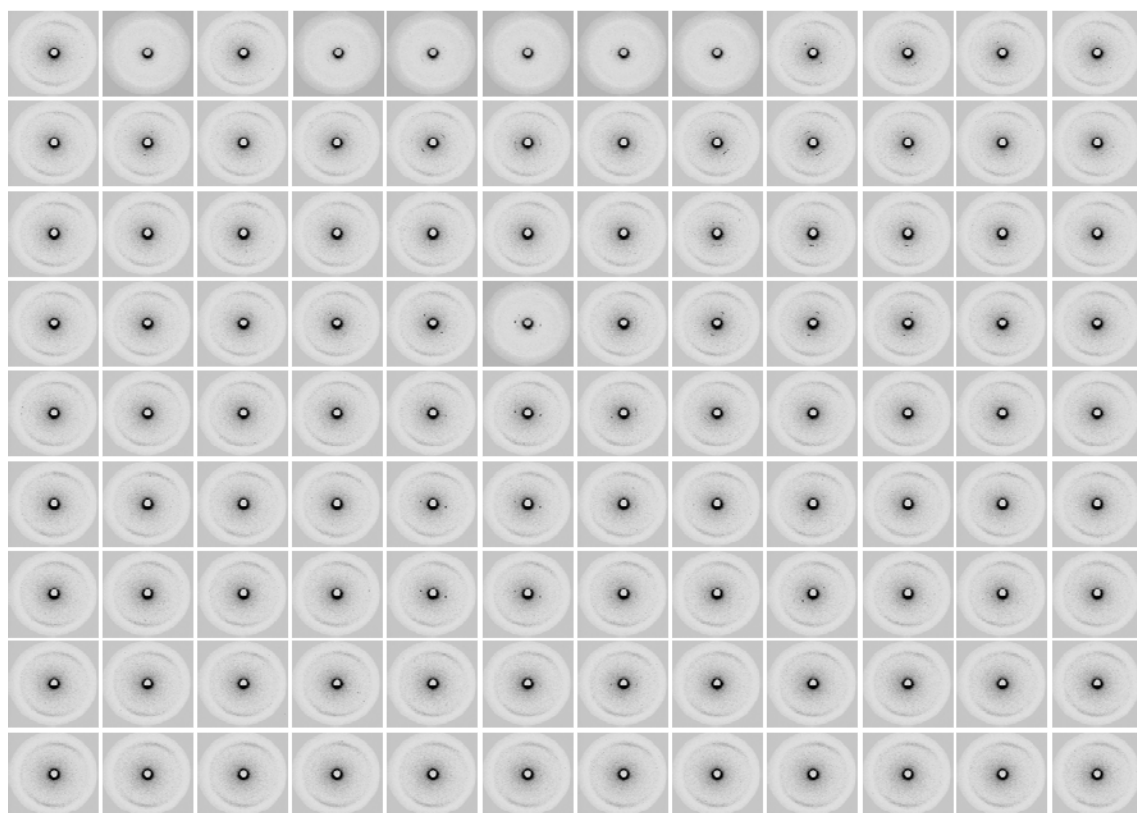

**Fig. S4** Scanning SR- $\mu$ -XRD patterns through the horizontal direction over many small spherulites of 25POP:75OPO mixture grown from neat liquid (a) at 6 °C and (b) at 9 °C.

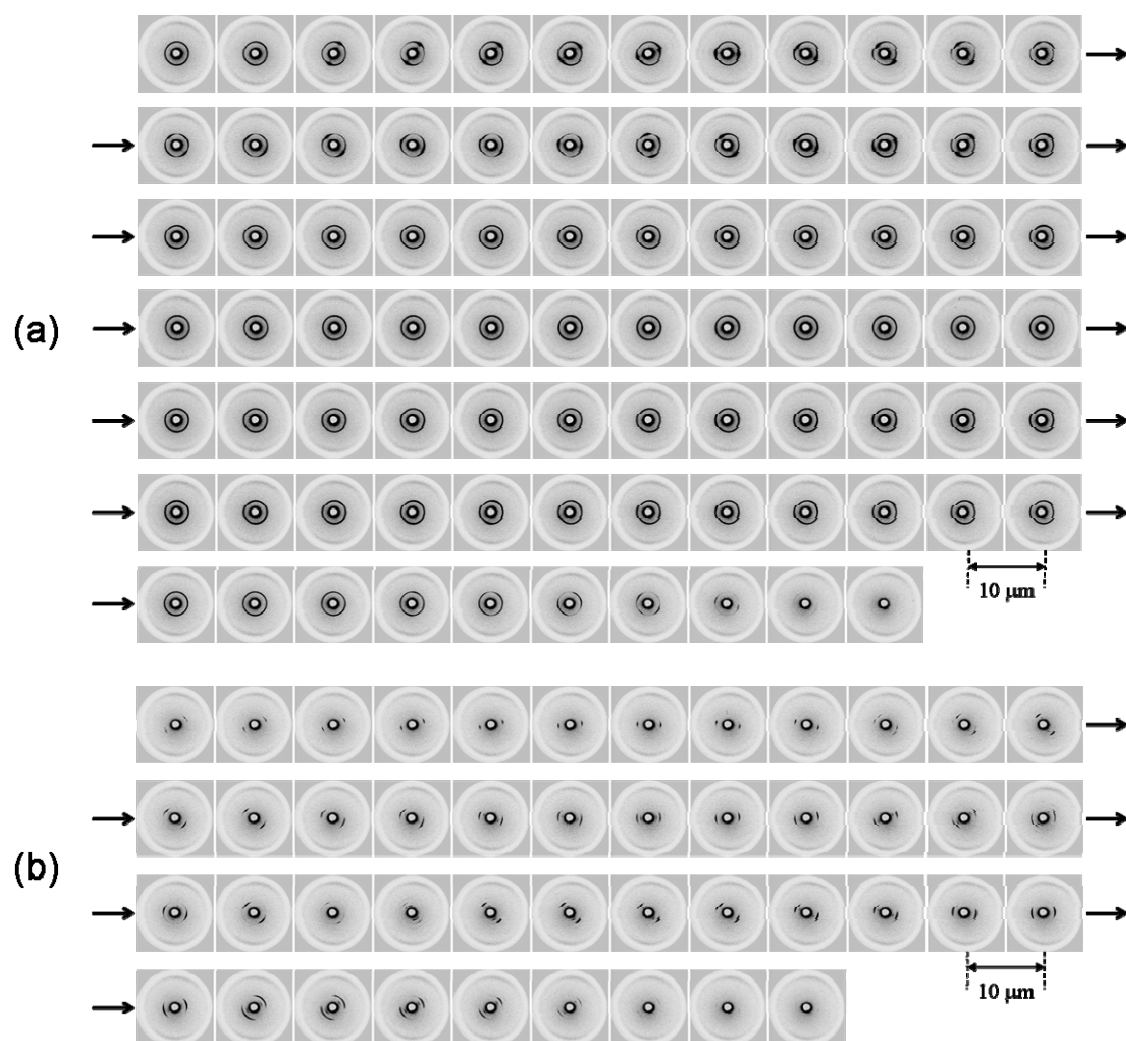

Supplement: c1ce05667k.pdf [file c1ce05667k.pdf]
